## **EFA6R suppresses ovarian cancer cell migration and invasion**

Salman Tamaddon-Jahromi<sup>1</sup>, Kate Murphy<sup>2</sup>, William Walker<sup>1</sup> and Venkateswarlu Kanamarlapudi<sup>1\*</sup>

<sup>1</sup>Institute of Life Science, School of Medicine, Swansea University, Swansea SA2 8PP, UK.

<sup>2</sup>Cellular Pathology, Swansea Bay University Health Board, Singleton Hospital, Swansea, SA2 8QA, UK.

Running title: **EFA6R antagonises ovarian cancer**

Correspondence: Venkateswarlu Kanamarlapudi (k.venkateswarlu@swansea.ac.uk)

**Keywords:** EFA6R; Arf6; Ovarian cancer; Tumour suppressor; Epigenetics; Cell migration

## **Summary statement**

EFA6R expression is epigenetically regulated in ovarian cancer cells and loss of expression correlates with increased tumour grade and enhanced tumour cell migration. EFA6R appears to mediate these effects independently of Arf6.

## **Abstract**

Exchange factor for ADP-ribosylation factor (Arf)6 (EFA6)R expression loss in ovarian cancer has shown to decrease patient survival. EFA6R contains the catalytic Sec7, pleckstrin homology (PH), and coiled-coil (CC) domains. To gain further insight into the role of EFA6R, this study further investigated EFA6R expression in OC and its putative role as a metastatic suppressor. EFA6R mRNA expression, assessed by RT-qPCR, was significantly downregulated in OC tissues and cell lines. OC tissue microarray staining with EFA6R antibody showed that loss of protein expression correlated with increased cancer grade. Furthermore, EFA6R protein levels, assessed by immunoblotting, were significantly reduced in OC tissues and cell lines. Treatment of SKOV-3 cells with 5-aza-2'deoxyctidine, an epigenetic regulator, restored EFA6R expression and attenuated functional cell migration and invasion, which was reversed by siRNA-mediated knockdown of EFA6R expression. This study also revealed that exogenously expressed EFA6R localises to the plasma membrane, through its PH domain, and thereby inhibits cell migration and invasion in the CC domain-dependent and an Arf6-independent manner. EFA6R loss-of-function involves epigenetic mechanisms in which downregulation increases OC tumour cell migration and invasion.

## INTRODUCTION

Ovarian cancer is the most lethal gynaecological cancer in women (Lambert et al., 2017). Epithelial OC is the most common form of OC. Cancer metastasis and the acquired resistance to drug treatment are the major causes of ovarian cancer-associated deaths (Lambert et al., 2017). OC is classified into stages 1-4 based on no metastasis (stage 1), metastasis of the primary tumour to the pelvic cavity (stage 2), abdomen wall (stage 3) or distal metastasis (stage 4). OC subtypes include serous (from the fallopian tube), endometrium (from the endometroid), mucinous (from the endocervix) and clear cell (within the vagina). Our understanding of the impact of metastatic suppressors in OC is currently limited, therefore identification of novel metastatic regulators can potentially serve as prognostic biomarkers, therapeutic targets and predictors of treatment response.

Exchange factor for ADP-ribosylation factor (Arf6) (EFA6)R expression loss in OC has been linked to a decrease in patient survival (Pils et al., 2005). EFA6R is a member of the EFA6 family of guanine exchange factors (GEFs), which activate Arf6 small GTPase (Tamaddon-Jahromi and Kanamarlapudi, 2017b). Arf6 small GTPase mediates membrane trafficking and cytoskeleton reorganisation at the plasma membrane by cycling between the active GTP-bound and inactive GDP-bound forms (Tamaddon-Jahromi and Kanamarlapudi, 2017a). Arf6 and its regulators not only show altered expression in many cancers but also promote cancer metastasis and drug resistance (Yamauchi et al., 2017). EFA6R shares a common domain organisation with the other members of the EFA6 family and the wider Arf6 GEFs (Sztul et al., 2019; Tamaddon-Jahromi and Kanamarlapudi, 2017b). It has a Sec7 catalytic domain which preferentially activates Arf6, a phosphatidylinositol 4,5-bisphosphate (PI4,5-P2) binding pleckstrin homology (PH) domain and a coiled-coil (Zangari et al.) region, which is both necessary for an efficient plasma membrane localisation and F-actin re-organisation (Kanamarlapudi, 2014). In addition to its role in OC, EFA6R expression is altered in several other cancers (Kanamarlapudi, 2014; Tamaddon-Jahromi and Kanamarlapudi, 2017b). Another member of the EFA6 family, EFA6B, has also been shown to antagonise breast cancer by promoting tight junction (TJ) proteins claudin-2 and occludin expression as well as blocking the transformer growth factor-beta pathway through Arf6 activation (Zangari et al., 2014).

In OC, a functional role for EFA6R has yet to be identified, although downregulation of EFA6R expression has previously been shown to have a drastic impact on patient survival

(Pils et al., 2005). Aberrant gene loss in OC is interconnected with epigenetic alterations, where DNA hypermethylation and histone de-acetylation within or upstream of promoter regions of tumour suppressor genes (TSGs) have been shown to lead to undesirable gene silencing (Baylin and Ohm, 2006). Therefore, epigenetic inhibitors have been utilised to revive the expression of many TSGs, subsequently reversing adverse phenotypes (Bohl et al., 2018). Here, we evaluated *EFA6R* expression in OC and established a correlation between *EFA6R* downregulation and OC metastasis.

## RESULTS AND DISCUSSION

### ***EFA6R* expression is downregulated in OC**

It has been shown previously that *EFA6R* is amongst a cluster of genes on chromosomal region 8p22, whose expression loss in OC has a detrimental impact on patient survival (Pils et al., 2005). To confirm this, we initially assessed *EFA6R* mRNA expression in the OC using an ovarian TissueScan<sup>TM</sup> cDNA array. When compared with that in healthy ovarian tissue, *EFA6R* mRNA expression was significantly reduced in cancers of grade I, and more markedly reduced in cancers of grade II and III (Fig. 1A). Given the heterogeneity in histologic origin, sensitivity to treatment and differential prevalence of OC subtypes, we also analysed the *EFA6R* mRNA expression based on the OC subtype (Fig. 1B). This revealed a significant reduction of *EFA6R* levels in all (endometrioid, clear cell and serous) but the mucinous subtype of OC. This is most likely due to a limited sample cohort, but we do not rule out a biological reason for this observation. Previous studies have shown that mucinous carcinomas differ from the other subtypes of OC in the frequency and pattern of loss of heterozygosity (LOH) at 8p (Lassus et al., 2001).

To further evaluate the relative expression of *EFA6R* at the protein level, immunohistochemical staining was performed on an ovarian tissue microarray (TMA) (Fig. 1C). Based on the average total sum of *EFA6R* immunostain distribution and intensity, *EFA6R* protein expression in the TMA was quantified (Fig. 1D). Overall, there was a significant loss in *EFA6R* expression when compared between healthy tissue and Grades I-III cancer cases. In further analysis, the expression of *EFA6R* protein in the lysates of tissues obtained from OC patients and their healthy counterparts were assessed by immunoblotting (Fig. 1E). *EFA6R* protein expression was significantly reduced in tumour sample lysates when

compared to that from healthy tissue. Using available OC cell lines, EFA6R mRNA expression in malignant cell lines was compared with that in the ovarian non-tumour cell line (T1074) (Fig. 1G, 1H). Compared to that in non-malignant cells, *EFA6R* mRNA expression was significantly reduced in OC cell lines. Furthermore, when assessed by immunoblotting, EFA6R protein expression was either undetectable or markedly reduced in the majority of OC cell lines. Overall, EFA6R expression loss is evident during the early stages of OC development, suggesting that EFA6R could be a useful biomarker for OC tumours.

### **Restoration of EFA6R expression attenuates OC cell migration and invasion**

Inactivation of gene expression through hypermethylation, by DNA methyltransferases (DNMTs), and histone de-acetylation, by histone de-acetylases (HDACs), has previously been described for several TSGs in OC (Ozdemir et al., 2012; Strathdee et al., 2001; Zhang et al., 2008). Therefore, using an OC cell line (SKOV-3), we tested whether suppression of EFA6R expression is associated with either of these epigenetic mechanisms. We began by assessing SKOV-3 sensitivity to the DNMT inhibitor 5-Aza-CdR, or the HDAC inhibitor suberanilohydroxamic acid (SAHA) by treating cells with 0.1-10 $\mu$ M of 5-Aza-CdR or SAHA for four days and assessing the viability (Fig. 2A). Although 5-Aza-CdR was relatively non-toxic, a significant reduction in SKOV3 cell viability was observed with 10 $\mu$ M SAHA. Treatment of SKOV-3 cells with 10 $\mu$ M 5-Aza-CdR, but not 1.0 $\mu$ M SAHA, significantly restored EFA6R protein expression (Fig. 2B), suggesting that DNA hypermethylation plays a major role in the epigenetic silencing of EFA6R gene expression. Therefore, in subsequent functional assays, we used 10 $\mu$ M 5-Aza-Cdr treatment to re-establish EFA6R expression.

5-Aza-Cdr restored EFA6R protein expression could be knocked down with an EFA6R-specific siRNA (siEFA6R) (Fig. 2C). Since cell migration and cell invasion are key steps in cancer metastasis, we next assessed the effect of restoration of EFA6R expression on cell migration and invasion by using wound healing and transwell migration/invasion assays (Fig. 2D). In these assays, SKOV-3 cells treated with 5-Aza-Cdr plus control siRNA exhibited reduced migration and invasion. In comparison, solvent (DMSO)-treated cells or cells concomitantly treated with 5-Aza-Cdr and siEFA6R exhibited increased cell migration (Fig. 2E). Comparative analysis showed that 5-Aza-Cdr treatment produced a ~3-fold reduction in both cell migration and invasion and this was effectively reversed by siEFA6R treatment (Fig. 2F). Overall we demonstrated that restoration of EFA6R expression leads to a significant reduction in both cell migration and invasion. This reduced metastatic phenotype was

specifically related to the re-establishment of EFA6R expression in ovarian cancer cells, as siRNA-mediated knockdown of EFA6R reversed this effect. Loss of EFA6R expression may, therefore, play a significant role in OC metastasis.

### **EFA6R suppresses cell migration/invasion in an Arf6 GEF activity-independent manner**

To determine whether plasma membrane localisation or the GEF activity or both are required for EFA6R to suppress cell migration and invasion, we analysed the effect of GFP-tagged EFA6R and its deletion mutants overexpression on SKOV-3 cells cell migration and invasion (Fig. 3A). EFA6R and the Sec7 deletion mutant (GFP-EFA6R  $\Delta$ Sec7) proteins showed expected plasma membrane localisation due to the presence of intact PH and CC domains (Fig. 3B). However, the deletion mutants of EFA6R lacking either the PH domain (GFP-EFA6R  $\Delta$ PH) or the CC domain (GFP-EFA6R  $\Delta$ CC) showed absent or weak (respectively) plasma membrane localisation. The addition of the CAAX motif of K-Ras at the C-terminus of EFA6R without the PH (GFP-EFA6R  $\Delta$ PH<sub>CAAX</sub>) or CC domain (GFP-EFA6R  $\Delta$ CC<sub>CAAX</sub>) restored the plasma membrane localisation of EFA6R (Kanamarlapudi, 2014). Immunoblotting confirmed the similar expression of GFP-tagged EFA6R and its deletion mutants in SKOV-3 cells post-transfection (Fig. 3C).

We further determined the effect of EFA6R and its deletion mutants on SKOV-3 cell invasion and migration (Fig. 3D). As expected, the migratory and invasive abilities of SKOV-3 cells expressing GFP-EFA6R were significantly reduced when compared to that of control GFP-transfected cells (Fig. 3E), confirming the anti-metastatic role of EFA6R in SKOV-3 cells. Expression of the GFP-EFA6R  $\Delta$ Sec7 also reduced cell migration/invasion, similar to that seen with GFP-EFA6R. Therefore, the Sec7 domain of EFA6R, which is the GEF domain required for the activation of Arf6, is not essential for attenuation of cell migration or invasion, indicating that EFA6R regulates OC cell metastasis independently of the Arf6 pathway. Indeed, consistent with this finding, EFA6R-mediated inhibition of cell migration/invasion was not reversed by siRNA-mediated down-regulation of Arf6 expression (siARF6) (Fig. 4). In contrast, EFA6R  $\Delta$ PH, which lacks plasma membrane localisation, failed to inhibit SKOV-3 cell migration/ invasion and this was reversed by targeting it to the plasma membrane by adding the CAAX motif (EFA6R  $\Delta$ PH<sub>CAAX</sub>), suggesting that the PH domain of EAF6R does not play a functional role in the attenuation of cell migration and invasion. Interestingly, we observed that EFA6R-mediated inhibition of cell

migration/invasion was reversed by either removal of the CC domain (GFP-EFA6R  $\Delta$ CC) or removing the CC domain and adding the CAAX domain (GFP-EFA6R  $\Delta$ CC<sub>CAAX</sub>). This indicates that the CC domain plays an important role in the EFA6R-mediated attenuation of cell migration and invasion in SKOV-3 OC cells.

We show that cell migration/invasion occurs independently of the Arf6 pathway, as deletion of the Sec7 domain or siRNA-mediated downregulation of Arf6 did not affect these cellular activities. These results were particularly surprising since the role of Arf6 in cancer cell migration and invasion has been extensively documented in other cancers, including breast, lung and pancreatic carcinomas (Hashimoto et al., 2019; Hashimoto et al., 2016; Li et al., 2017; Marchesin et al., 2015; Morishige et al., 2008; Yamauchi et al., 2017; Yoo et al., 2016; Zhang et al., 2015). EFA6R localisation to the plasma membrane, through the PH domain, is important for its ability to inhibit cell migration and invasion. However, the PH domain itself is functionally irrelevant to the inhibition of cell invasion by EFA6R, as its requirement for the membrane localisation of EFA6R can be bypassed using the CAAX tag. Furthermore, it is notable that the CC domain plays an important functional role in attenuating cell migration and invasion and the CAAX motif did not bypass the functional importance of the CC domain. Taken together, these findings demonstrate that the CC domain of EFA6R may be the site of possible protein interactions, by which it negatively regulates cell metastasis. In contrast, the PH and Sec7 domains do not seem to play a functional role in the inhibition of cell migration or invasion. Indeed, the CC domain of EFA6R has previously been shown to be responsible for cytoskeleton rearrangements and interactions with downstream signalling proteins (Kanamarlapudi, 2014), however, no interacting proteins of the EFA6R CC domain have been identified so far.

In summary, we demonstrated here that EFA6R is epigenetically suppressed in OC. DNA hypermethylation is particularly involved in that the DNMT inhibitor (5-Aza-CdR) restored EFA6R expression in OC cells, thereby reducing their ability to migrate and invade. Furthermore, EFA6R-mediated cell migration and invasion occurs in an Arf6-independent manner and appears to be mainly regulated through its CC domain, highlighting the need for further investigations into the exact function of this EFA6R domain in OC cells. Further studies into the suitability of using EFA6R expression as an early detector of OC may prove to be transformative for OC diagnosis. OC can be cured in more than 90% of cases if it is detected early.





## **MATERIALS AND METHODS**

### **Plasmids**

The GFP-EFA6R, GFP-EFA6R  $\Delta$ Sec7, GFP-EFA6R  $\Delta$ PH and GFP-EFA6R  $\Delta$ CC expressing plasmids used in this study have been described previously (Kanamarlapudi, 2014). The GFP-EFA6R  $\Delta$ PH and GFP-EFA6R  $\Delta$ CC were targeted to the membrane (GFP-EFA6R  $\Delta$ CC<sub>CAAX</sub> and GFP-EFA6R  $\Delta$ PH<sub>CAAX</sub>) by attaching a C-terminal CAAX motif using polymerase chain reaction (PCR) with a 3'-primer containing the coding sequence for the CAAX motif from K-Ras as described previously (Venkateswarlu et al., 2007). Human EFA6R siRNA (5'-GCUACUGAGUAACGAUGAA-3') and negative control siRNA (siControl) have also been described previously (Kanamarlapudi, 2014).

### **Cell culture and transfection**

Human ovarian non-malignant (T1074) and malignant (SKOV-3) cell lines were provided by Prof. Deyarina Gonzalez (Swansea University). OVSAHO and Caov-3 cell lines were provided by Dr Marion Curtis (University of Chicago). OVCAR8, COV504 and COV318 cell lines were provided by Dr Alan Richardson (Keele University). All cell lines were cultured aseptically at 37°C/5% CO<sub>2</sub> in RPMI 1640 (Sigma, UK) supplemented with 10% foetal bovine serum (FBS; Sigma, UK), 100 U/ml penicillin, 0.1 mg/ml streptomycin (Sigma, UK) and 2 mM GlutaMAX (Gibco, UK). Cell counting was performed using a Countess cell counting chamber slide (Invitrogen, UK). SKOV-3 cells were transiently transfected with either 100nM siRNA or 2µg plasmid DNA by electroporation using the Neon transfection system (Thermo Fisher Scientific, UK) using the following parameters: 1170 pulse voltage, 30ms pulse width and 2 pulse number. Following four days of incubation, the transfected cells were subjected to various functional assays. The transfection efficiency of the EFA6R and its deletion constructs was assessed by measuring GFP-derived fluorescence (of GFP-tagged EFA6R and its deletion mutants) using standard flow cytometry (Thompson and Kanamarlapudi, 2014).

### **Real-Time Quantitative Polymerase Chain Reaction (RT-qPCR)**

*EFA6R* gene (mRNA) expression was carried out in healthy and cancer ovarian tissues by RT-qPCR using Tissuescan™ ovarian cancer cDNA arrays I-IV (Origene Technologies, USA) and *EFA6R* (NM\_206909.3) sequence-specific primers (Forward 5'-CGCAGCGGCAGAGACATTT-3' and Reverse 5'-TTTGGCCTTGGCAACACTCT-3'); the

cDNA arrays were pre-normalised to  $\beta$ -actin expression. For cell lines, total RNA was extracted from cell lines using TRI Reagent (Sigma, UK). cDNA was prepared from total RNA using the High Capacity cDNA Reverse Transcription Kit (Thermo Fisher Scientific, UK) (Kanamarlapudi et al., 2012). RT-qPCR was carried out using the EFA6R primers (described above),  $\beta$ -actin as housekeeping gene (Forward: 5'-CAGCCATGTACGTTGCTATCCAGG-3; reverse: 5'-AGGTCCAGACGCAGGATGGCA-3') and 2X RT<sup>2</sup> SYBR Green qPCR master mix (Qiagen, UK). The relative fold change in gene expression was analysed using the double delta C<sub>q</sub> analysis ( $2^{-\Delta\Delta C_q}$ ) method (Livak and Schmittgen, 2001).

### **Western blotting**

Total protein was extracted from cell lines using TRI Reagent (Sigma, UK). 40 $\mu$ g of isolated protein samples were then separated using 10% sodium dodecyl sulphate-polyacrylamide gel electrophoresis (SDS-PAGE) for 40min at 200 volts, then transferred, using Trans-blot Turbo transfer system (Bio-Rad, UK), on to polyvinylidene fluoride (PVDF) membrane (GE Healthcare Life Sciences, UK) at 25 volts for 30min. Following blocking using blocking buffer (5% non-fat milk prepared in TBS-T [10mM Tris-HCl, pH 7.4, 150mM NaCl, 0.05% [v/v] Tween 20]) for 1h, the membrane was probed with an anti-EFA6R rabbit polyclonal antibody (1:500) (Kanamarlapudi, 2014) or an anti- $\beta$ -actin mouse monoclonal antibody (1:10,000) (R&D Systems, UK) diluted in blocking buffer. After washing 3 times with TBS-T, the membrane was incubated with horseradish peroxidase (HRP)-conjugated secondary antibody (GE Healthcare, USA) diluted 1 in 2500 in blocking buffer. The membrane was incubated in the ECL Select substrate (GE Healthcare Life Sciences, UK) and visualised bands using a ChemicDoc XRS system (Bio-Rad, UK) as described (Thompson and Kanamarlapudi, 2015a). The ovarian OncoPair INSTA-Blot (Novus Biologicals, UK) was probed using the anti-EFA6R antibody or an anti-GAPDH goat polyclonal antibody (Everest Biotech, UK) diluted 1 in 1000 in blocking buffer.

### **Immunohistochemistry**

Immunohistochemistry was performed on commercially-obtained ovarian normal and cancer TMAs (US Biomax, USA) as described (Kanamarlapudi et al., 2012) and using a benchmark ultra IGC staining module (Roche/Ventana Medical Systems, USA). Briefly, following heat-induced antigen retrieval for 32min in CC1 retrieval buffer (pH 8.0 - 8.5), the anti-EFA6R

antibody was used at a dilution of 1 in 150 and incubated at 36°C for 36min. OptiView HQ universal linker and HRP multimer were added for 8min to enhance stain quality. Diaminobenzidine (DAB) was used as the chromogen, and samples were counterstained with haematoxylin for 12min. The TMAs were blindly scored by 3 individuals. The protein expression was analysed by using a scoring method based on the sum of proportion of epithelial cells that showed staining (0 = none, +1 = <10%, +2 = 10-25%, +3 = 25-50%, +4 = 59-75%, +5 = 75-100%) and the intensity of staining (0 = none, +1 = weak, +2 = moderate, +3 = strong).

### **Drug treatment**

SKOV-3 cells were treated with indicated concentrations of 5-Aza-CdR (Sigma, UK) and SAHA (LC laboratories, UK) or 0.1% DMSO (solvent control). Drugs were replaced after 2 days of incubation. Following 4 days of the treatment, the cells were subjected to various functional assays.

### **Functional assays**

*Cell viability:* The viability of SKOV-3 cells treated with different concentrations of 5-Aza-CdR and SAHA for 4 days was assessed using the Kit-8 colourimetric cell viability kit (Biomake, USA).

*Cell migration assay:* SKOV-3 cells transfected without or with 100nM siRNA and simultaneously treated with 10µM 5-Aza-Cdr for 4 days were seeded into 2-well cell culture inserts (Ibidi, UK). After cell attachment (6h), the culture insert was removed and fresh medium added. Images of gap closure (migration) were recorded at 0h and 12h using an Olympus IX71 microscope and XM10 camera (Olympus, USA). The area between two edges of the migratory cells was measured using ImageJ software where cell migration presented as percentage of gap closure using the equation:  $([\text{pre-migration}]_{\text{area}} - [\text{post-migration}]_{\text{area}}) / [\text{pre-migration}]_{\text{area}} \times 100\%$  (Davies et al., 2014).

*Transwell migration/invasion assay:* SKOV-3 cells transfected without or with siRNA and treated with solvent DMSO or 10µM Aza-Cdr for 4 days, or cells transfected with various EFA6R constructs DNA for 3 days, were resuspended in RPMI medium and seeded (250µl) into a 0.8µm pore sized polycarbonate membrane ThinCert™ cell culture insert (Greiner Bio-

one, UK), pre-coated with 100 $\mu$ l of 1.2mg/ml of Matrigel (Sigma, UK) (for cell invasion assay), placed in a well of a 24-well plate. RPMI medium containing 10% FBS (as the chemoattractant) was placed outside of the insert within the well. Following 8h of cell migration or 16h of cell invasion, the inserts were washed twice with PBS, fixed with 4% paraformaldehyde (PFA) (Sigma, UK) for 10min, and stained with 0.4% crystal violet (Sigma, UK) for a further 10min. The staining was extracted using 5% SDS and absorption was subsequently measured at 570 nm using a plate reader.

*Immunofluorescence:* This was carried out as previously described (Kanamarlapudi, 2014). SKOV-3 cells grown on glass coverslips were transfected with GFP-EFA6R constructs for 48h, fixed with 4% PFA for 15min and incubated with 1 $\mu$ g/ml DAPI (Sigma, UK) in PBS for 5min to stain the nucleus. Coverslips were mounted on glass microscope slides using mounting solution (0.1M Tris-HCl, pH 8.5, 10% Mowiol [Sigma, UK] and 50% glycerol) containing 2.5% DABCO (1,4 diazabicyclo(2.2.2)octane) (Thompson and Kanamarlapudi, 2015b) and cells imaged using LSM710 confocal fluorescence microscope (Carl Zeiss AG, Germany) with a 63x oil-immersion objective lens. Scale bar in confocal images represents 10 $\mu$ m. The confocal images shown are representative of >50 cells from at least three independent cell preparations.

### **Data Analysis**

Data were analysed using GraphPad Prism software (USA). In some selected immunoblotting images, the average of three independent experiments is displayed as fold-change or % change of expression. A value of  $P > 0.05$  was considered not significant (ns) whereas  $P < 0.05$ ,  $P < 0.01$ ,  $P < 0.001$  and  $P < 0.0001$  (denoted as \*, \*\*, \*\*\* and \*\*\*\*\*) were used as the general limit of significance.

## **Acknowledgements**

We are grateful to Prof. Deyarina Gonzalez (Swansea University, Swansea, UK) for providing T1074 and SKOV-3 cell lines, Dr Marion Curt (University of Chicago, Chicago, IL, USA) for providing OVSAHO and Caov-3 cell lines and Dr James Cronin (Swansea University, Swansea, UK) for providing OVCAR8, COV504 and COV318 cell lines. We also thank members of the VK's lab for helping by providing various reagents necessary for the study.

## **Competing Interests**

The authors declare no competing or financial interests.

## **Author contributions**

V.K. conceived the project, designed and performed experiments and reviewed the manuscript. S.T-J. performed and analysed experiments and wrote the manuscript. W.W: analysed the data and reviewed the manuscript. K.M performed experiments and reviewed the manuscript. All authors had final approval of the manuscript.

## **Funding**

This work was supported by funding from BBSRC UK (BB/F017596/1, BB/C515455/2 and BB/S019588/1) and MRC UK (G0401232). ST-J received a Health Care and Research Wales PhD studentship.

## References

- Baylin, S. B. and Ohm, J. E.** (2006). Epigenetic gene silencing in cancer – a mechanism for early oncogenic pathway addiction? *Nature Reviews Cancer* **6**, 107.
- Bohl, S. R., Bullinger, L. and Rucker, F. G.** (2018). Epigenetic therapy: azacytidine and decitabine in acute myeloid leukemia. *Expert Rev Hematol* **11**, 361-371.
- Davies, J. C., Tamaddon-Jahromi, S., Jannoo, R. and Kanamarlapudi, V.** (2014). Cytohesin 2/ARF6 regulates preadipocyte migration through the activation of ERK1/2. *Biochem Pharmacol* **92**, 651-60.
- Hashimoto, S., Furukawa, S., Hashimoto, A., Tsutaho, A., Fukao, A., Sakamura, Y., Parajuli, G., Onodera, Y., Otsuka, Y., Handa, H. et al.** (2019). ARF6 and AMAP1 are major targets of KRAS and TP53 mutations to promote invasion, PD-L1 dynamics, and immune evasion of pancreatic cancer. *Proc Natl Acad Sci US A* **116**, 17450-17459.
- Hashimoto, S., Mikami, S., Sugino, H., Yoshikawa, A., Hashimoto, A., Onodera, Y., Furukawa, S., Handa, H., Oikawa, T., Okada, Y. et al.** (2016). Lysophosphatidic acid activates Arf6 to promote the mesenchymal malignancy of renal cancer. *Nature Communications* **7**, 10656.
- Kanamarlapudi, V.** (2014). Exchange factor EFA6R requires C-terminal targeting to the plasma membrane to promote cytoskeletal rearrangement through the activation of ADP-ribosylation factor 6 (ARF6). *J Biol Chem* **289**, 33378-90.
- Kanamarlapudi, V., Owens, S. E., Lartey, J. and Lopez Bernal, A.** (2012). ADP-ribosylation factor 6 expression and activation are reduced in myometrium in complicated pregnancies. *PLoS One* **7**, e37954.
- Lambert, A. W., Pattabiraman, D. R. and Weinberg, R. A.** (2017). EMERGING BIOLOGICAL PRINCIPLES OF METASTASIS. *Cell* **168**, 670-691.
- Lassus, H., Laitinen, M. P., Anttonen, M., Heikinheimo, M., Aaltonen, L. A., Ritvos, O. and Butzow, R.** (2001). Comparison of serous and mucinous ovarian carcinomas: distinct pattern of allelic loss at distal 8p and expression of transcription factor GATA-4. *Lab Invest* **81**, 517-26.
- Li, R., Peng, C., Zhang, X., Wu, Y., Pan, S. and Xiao, Y.** (2017). Roles of Arf6 in cancer cell invasion, metastasis and proliferation. *Life Sci* **182**, 80-84.
- Livak, K. J. and Schmittgen, T. D.** (2001). Analysis of relative gene expression data using real-time quantitative PCR and the 2(-Delta Delta C(T)) Method. *Methods* **25**, 402-8.
- Marchesin, V., Montagnac, G. and Chavrier, P.** (2015). ARF6 promotes the formation of Rac1 and WAVE-dependent ventral F-actin rosettes in breast cancer cells in response to epidermal growth factor. *PLoS One* **10**, e0121747.
- Morishige, M., Hashimoto, S., Ogawa, E., Toda, Y., Kotani, H., Hirose, M., Wei, S., Hashimoto, A., Yamada, A., Yano, H. et al.** (2008). GEP100 links epidermal growth factor receptor signalling to Arf6 activation to induce breast cancer invasion. *Nat Cell Biol* **10**, 85-92.
- Ozdemir, F., Altinisik, J., Karateke, A., Coksuer, H. and Buyru, N.** (2012). Methylation of tumor suppressor genes in ovarian cancer. *Experimental and therapeutic medicine* **4**, 1092-1096.
- Pils, D., Horak, P., Gleiss, A., Sax, C., Fabjani, G., Moebus, V. J., Zielinski, C., Reinthaller, A., Zeillinger, R. and Krainer, M.** (2005). Five genes from chromosomal band 8p22 are significantly down-regulated in ovarian carcinoma: N33 and EFA6R have a potential impact on overall survival. *Cancer* **104**, 2417-29.

**Strathdee, G., Appleton, K., Illand, M., Millan, D. W., Sargent, J., Paul, J. and Brown, R.** (2001). Primary ovarian carcinomas display multiple methylator phenotypes involving known tumor suppressor genes. *Am J Pathol* **158**, 1121-7.

**Sztul, E., Chen, P. W., Casanova, J. E., Cherfils, J., Dacks, J. B., Lambright, D. G., Lee, F. S., Randazzo, P. A., Santy, L. C., Schurmann, A. et al.** (2019). ARF GTPases and their GEFs and GAPs: concepts and challenges. *Mol Biol Cell* **30**, 1249-1271.

**Tamaddon-Jahromi, S. and Kanamarlapudi, V.** (2017a). ADP-Ribosylation Factor-6 (ARF6). In *Encyclopedia of Signaling Molecules*, (ed. S. Choi), pp. 1-9. New York, NY: Springer New York.

**Tamaddon-Jahromi, S. and Kanamarlapudi, V.** (2017b). PSD3. In *Encyclopedia of Signaling Molecules*, (ed. S. Choi), pp. 1-5. New York, NY: Springer New York.

**Thompson, A. and Kanamarlapudi, V.** (2014). The regions within the N-terminus critical for human glucagon like peptide-1 receptor (hGLP-1R) cell surface expression. *Sci Rep* **4**, 7410.

**Thompson, A. and Kanamarlapudi, V.** (2015a). Agonist-induced internalisation of the glucagon-like peptide-1 receptor is mediated by the Galphaq pathway. *Biochem Pharmacol* **93**, 72-84.

**Thompson, A. and Kanamarlapudi, V.** (2015b). Distinct regions in the C-Terminus required for GLP-1R cell surface expression, activity and internalisation. *Mol Cell Endocrinol* **413**, 66-77.

**Venkateswarlu, K., Bandom, K. G. and Yun, H.** (2007). PI-3-kinase-dependent membrane recruitment of centaurin-alpha2 is essential for its effect on ARF6-mediated actin cytoskeleton reorganisation. *J Cell Sci* **120**, 792-801.

**Yamauchi, Y., Miura, Y. and Kanaho, Y.** (2017). Machineries regulating the activity of the small GTPase Arf6 in cancer cells are potential targets for developing innovative anti-cancer drugs. *Adv Biol Regul* **63**, 115-121.

**Yoo, J. H., Shi, D. S., Grossmann, A. H., Sorensen, L. K., Tong, Z., Mleynek, T. M., Rogers, A., Zhu, W., Richards, J. R., Winter, J. M. et al.** (2016). ARF6 Is an Actionable Node that Orchestrates Oncogenic GNAQ Signaling in Uveal Melanoma. *Cancer Cell* **29**, 889-904.

**Zangari, J., Partisani, M., Bertucci, F., Milanini, J., Bidaut, G., Berruyer-Pouyet, C., Finetti, P., Long, E., Brau, F., Cabaud, O. et al.** (2014). EFA6B antagonizes breast cancer. *Cancer Res* **74**, 5493-506.

**Zhang, H., Zhang, S., Cui, J., Zhang, A., Shen, L. and Yu, H.** (2008). Expression and promoter methylation status of mismatch repair gene hMLH1 and hMSH2 in epithelial ovarian cancer. *Aust N Z J Obstet Gynaecol* **48**, 505-9.

**Zhang, Y., Du, J., Zheng, J., Liu, J., Xu, R., Shen, T., Zhu, Y., Chang, J., Wang, H., Zhang, Z. et al.** (2015). EGF-reduced Wnt5a transcription induces epithelial-mesenchymal transition via Arf6-ERK signaling in gastric cancer cells. *Oncotarget* **6**, 7244-7261.

## Figure Legends

**Fig. 1 EFA6R expression is significantly reduced in OC.** **A** RT-qPCR analysis of *EFA6R* mRNA expression in human ovarian healthy and cancer tissues and the results displayed based on OC histology grading. **B** The data in (A) was separated based on four OC subtypes: mucinous, endometrioid, clear cell and serous. The box plots in (A) and (B) show the median fold-change (\*\* $P < 0.01$ , \*\*\* $P < 0.001$ , and \*\*\*\* $P < 0.0001$ , based on Kruskal–Wallis test with Dunn’s test). **C** Representative immunohistochemical (IHC) images of the EFA6R protein expression in a TMA containing human ovarian healthy and OC tissue sections, probed with an anti-EFA6R antibody. The scale bar is 100 $\mu$ m. **D** The IHC score, based on total sum of distribution of stain (from 0 to +5) and stain intensity (0 = none, +1 = weak, +2 = moderate and +3 = strong). The box plots show the median IHC score (\* $P < 0.05$ , \*\*\*\* $P < 0.0001$ , based on Kruskal–Wallis test with Dunn’s test). **E** Western blot analysis of EFA6R expression in OC tissue and healthy adjacent ovarian tissue. An ovarian cancer OncoPair INSTA-Blot probed with the anti-EFA6R and anti-GAPDH (loading control) antibodies. **F** Pooled fold-change in EFA6R protein expression, as assessed by Western blot in (E), in healthy tissue versus OC tissue (\*\* $P < 0.01$ , based on one-sample t-test). **G** RT-qPCR analysis of *EFA6R* mRNA expression in human ovarian non-malignant (T1704) and OC cell lines. The data are presented as the mean  $\pm$  s.e.m. from three independent experiments ( $n = 3$ ) (\* $P < 0.05$ , \*\* $P < 0.01$ , \*\*\*\* $P < 0.0001$ , based on Mann-Whitney test). **H** Western blot analysis of EFA6R protein expression in ovarian non-malignant (T1704) and OC cell lines using the anti-EFA6R and anti- $\beta$ -actin (loading control) antibodies. The intensity of the bands was quantified by using Image J software, normalised to the expression of  $\beta$ -actin and shown below the EFA6R blot.

**Fig. 2 EFA6R suppresses SKOV-3 cell migration and invasion.** **A** Dose-dependent effect of epigenetic drugs (5-Aza-CdR and SAHA) on SKOV-3 cell viability (displayed as absorbance at 570nm [A570]). The data are shown as mean  $\pm$  s.e.m.,  $n=3$ , \*\* $P < 0.01$ , One-way ANOVA with Dunnett’s test. **B** Western blot analysis of EFA6R protein expression in SKOV-3 cells following a 4-day treatment with 10 $\mu$ M 5-Aza-CdR or 1.0 $\mu$ M SAHA (DMSO = solvent control); probed with the anti-EFA6R and anti- $\beta$ -actin (loading control) antibodies. **C** Western blot analysis of EFA6R protein expression in SKOV-3 cells, following a four-day treatment with 10  $\mu$ M 5-Aza-Cdr with no siRNA or transfected with siControl or siEFA6R (DMSO = solvent control); probed with anti-EFA6R and anti- $\beta$ -actin (loading control) antibodies. The intensity of the bands was quantified, normalised to the expression of  $\beta$ -actin and



presented below the EFA6R blot as fold change. **D** Representative images of SKOV-3 cell migration (assessed by using wound healing and transwell migration assays) and invasion (assessed by using transwell coated with Matrigel). In the wound healing assay, cell migration is shown at 0h and 12h following removal of the Ibidi insert. Cell migration was also assessed using a transwell migration assay. The bottom panel shows cell invasion assessed using Matrigel-coated transwell migration inserts. Following 8h of cell migration and 16h of cell invasion, the cells were fixed with 4% PFA and stained with 0.2% crystal violet. **E** Relative cell migration was assessed in wound healing assay by measuring gap closure (%) compared to that in control post-12h of the Ibidi insert removal. The data are presented as mean  $\pm$  s.e.m. (n=3, \*\*\* $P$  <0.001, based on One-way ANOVA with Dunnett's test). **F** The crystal violet staining was extracted from migrated or invaded cells using 5% SDS and its absorbance was measured at 570nm. The data are shown as mean  $\pm$  s.e.m. (n=3, \*\*\* $P$  <0.001, based on One-way ANOVA with Dunnett's test).

**Fig. 3 EFA6R attenuates cell invasion in a CC domain-dependent manner.** **A** Schematic view of GFP and GFP-tagged EFA6R and its deletion constructs used in this study. **B** Analysis of intracellular localisation of GFP-tagged EFA6R and its deletion constructs expressed in SKOV-3 cells using confocal fluorescence microscopy. Images are representative of 75-100 cells. **C** Western blot (WB) analysis of GFP-tagged EFA6R and its deletion constructs expression in SKOV-3 cells by using an anti-GFP antibody. **D** Representative images of migration and invasion (assessed using Transwell inserts) of SKOV-3 cells transfected with GFP-tagged EFA6R and its deletion mutants. 8h post-migration and 16h post-invasion, the cells were fixed with 4% PFA and stained with 0.2% crystal violet. **E** Crystal violet staining of migrating/invading cells was extracted using 5% SDS and the absorption was measured at 570nm. The data are presented as mean  $\pm$  s.e.m. (n=3, \*\*\* $P$  <0.001, based on One-way ANOVA with Dunnett's test).

**Fig. 4. SKOV-3 cell migration and invasion are independent of the Arf6 pathway.** **A** Representative images of SKOV-3 cell migration and invasion (assessed by using transwell inserts). Following a 4-day treatment with 10 $\mu$ M 5-Aza-Cdr with no siRNA or transfected with siControl or siArf6, SKOV-3 cells were subjected to cell migration and invasion (using transwell insert). 8h post-migration and 16h post-invasion, the cells were fixed with 4% PFA and stained using 0.2% crystal violet. **B** The crystal violet staining of invading cells was extracted using 5% SDS and the absorption was measured at 570nm. Errors bars represent the

± s.e.m. (n=3, \*\*\**P* <0.001, based on One-way ANOVA with Dunnett's test). **C** Western blotting analysis of Arf6 expression in SKOV-3 cells transfected for 4 days with 100nM siControl or siArf6 using an anti-Arf6, an anti-ARF1 and an anti-β-actin (loading control) antibodies.

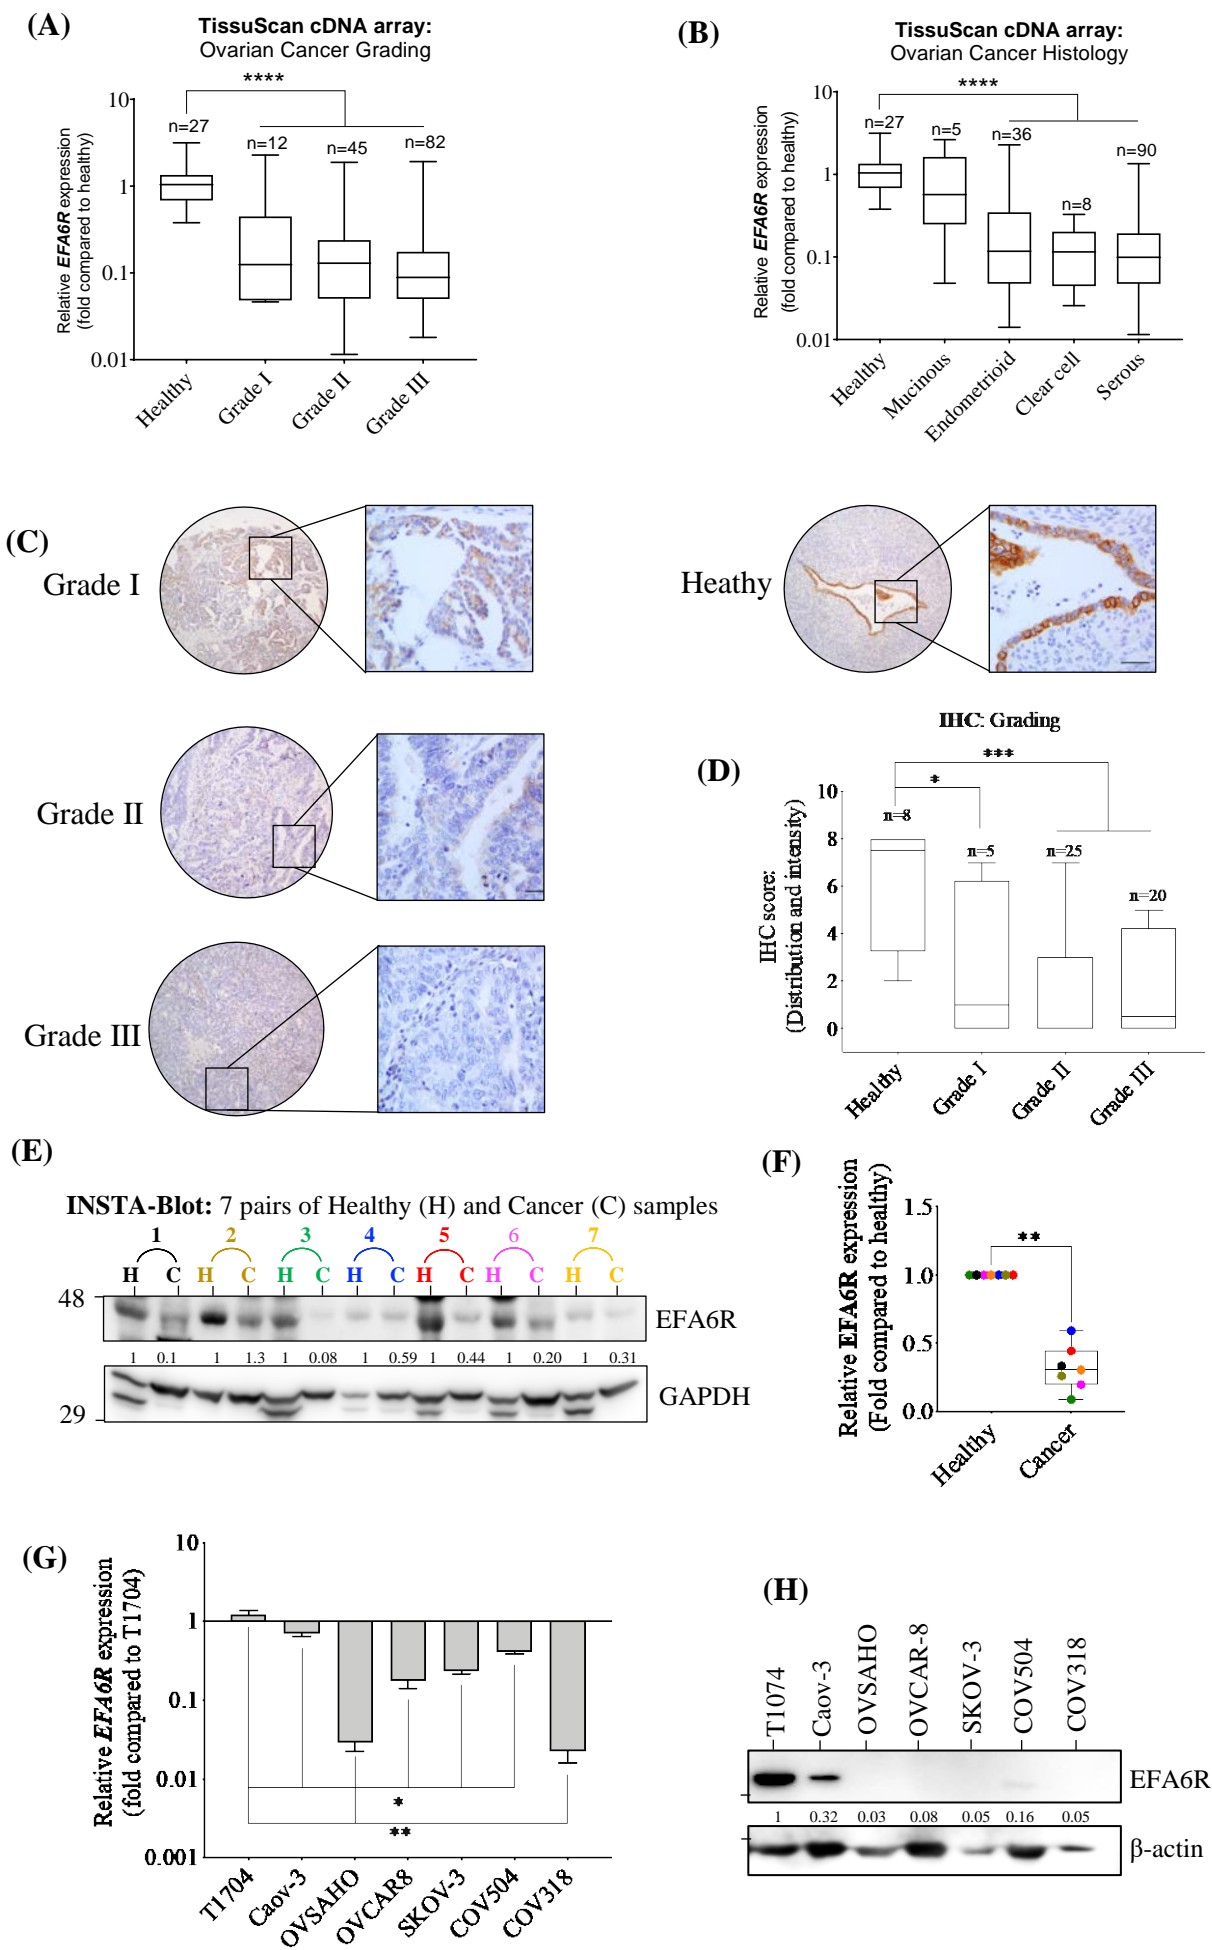

**Fig. 1**

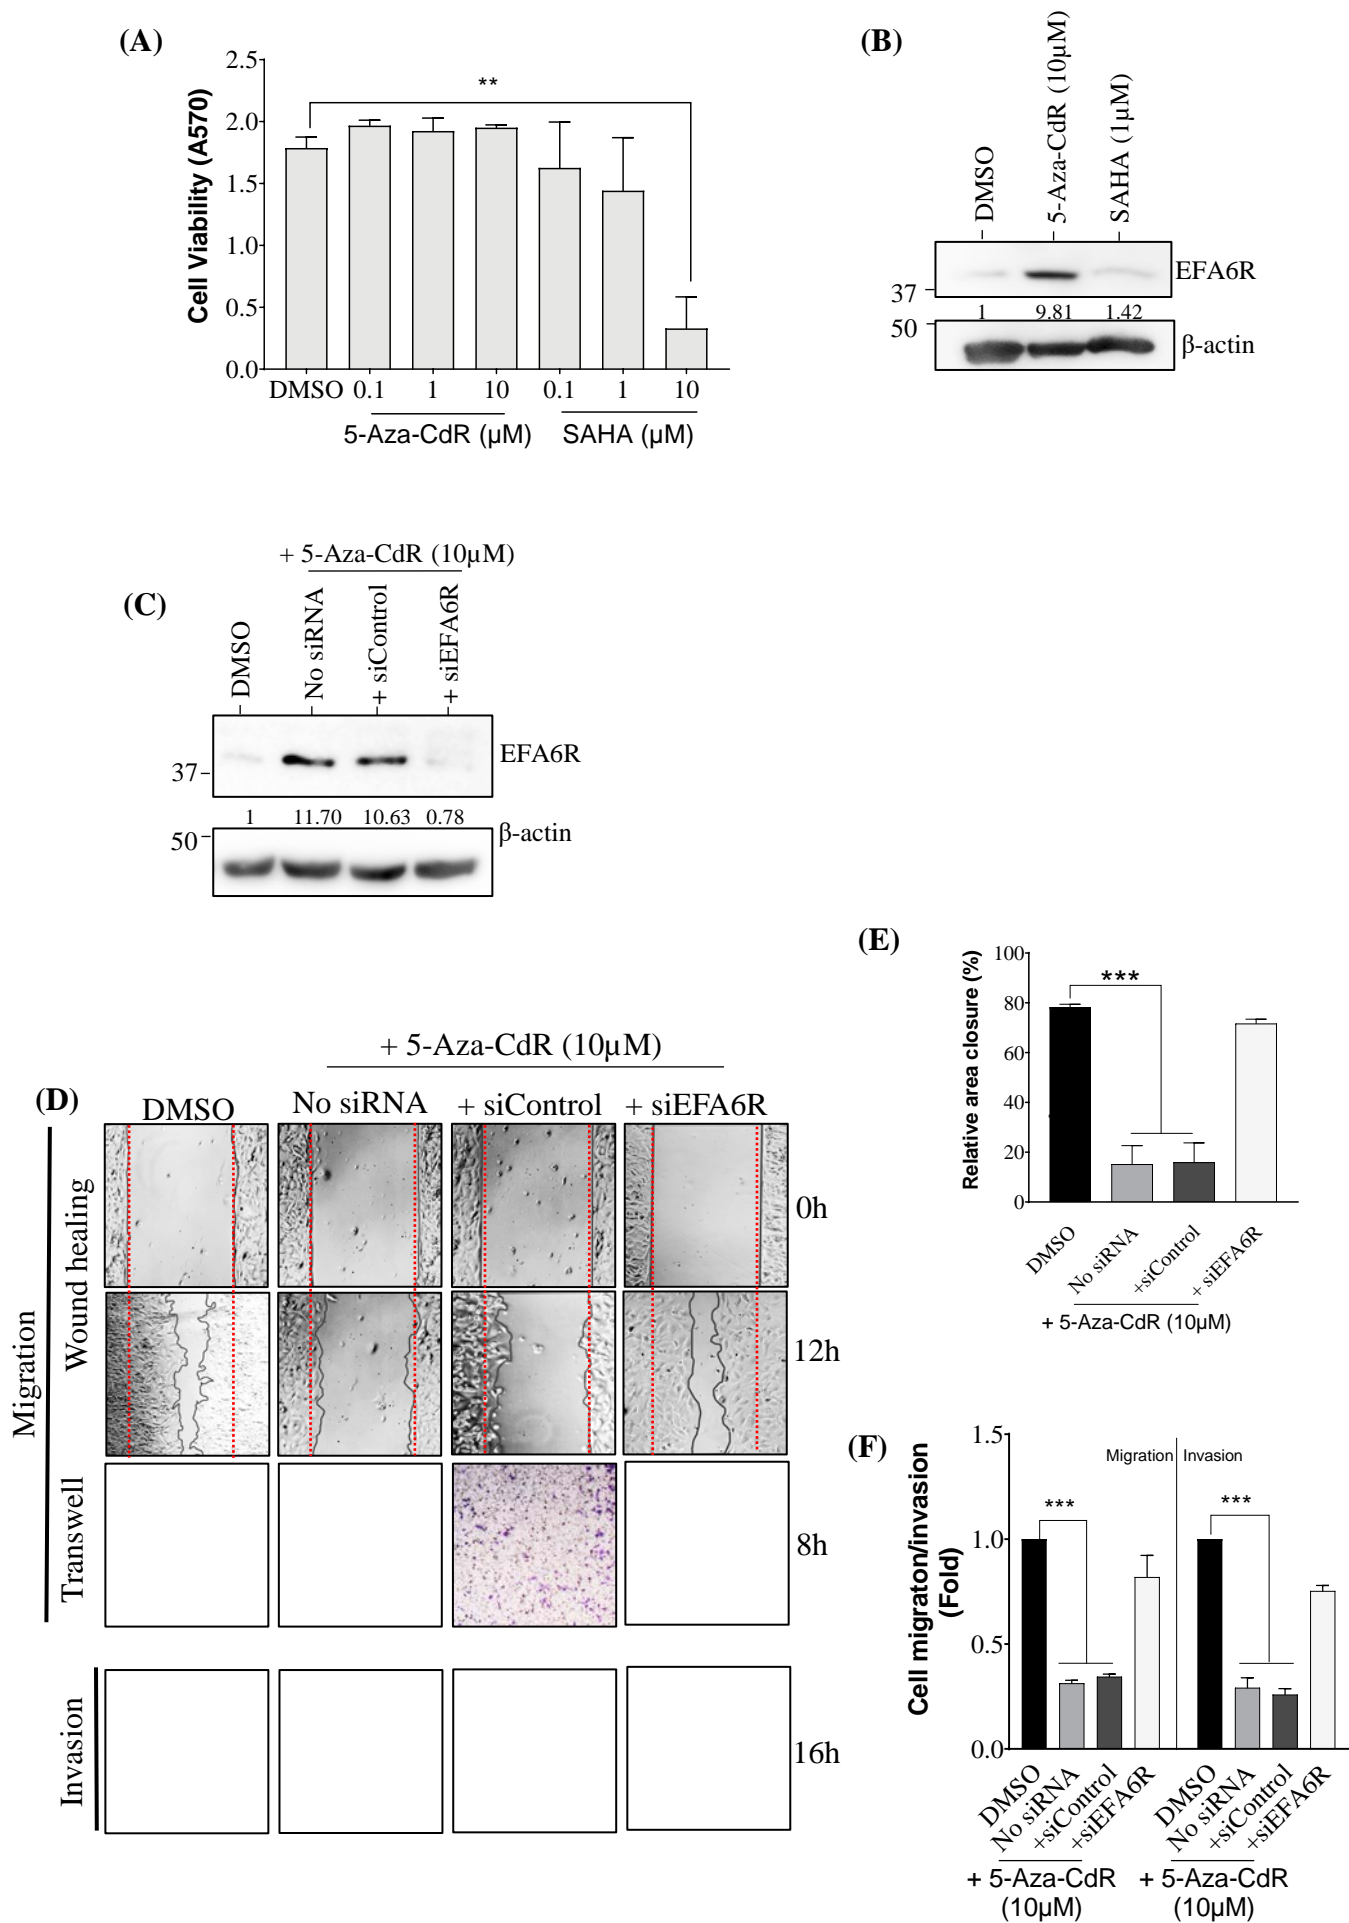

**Fig. 2**

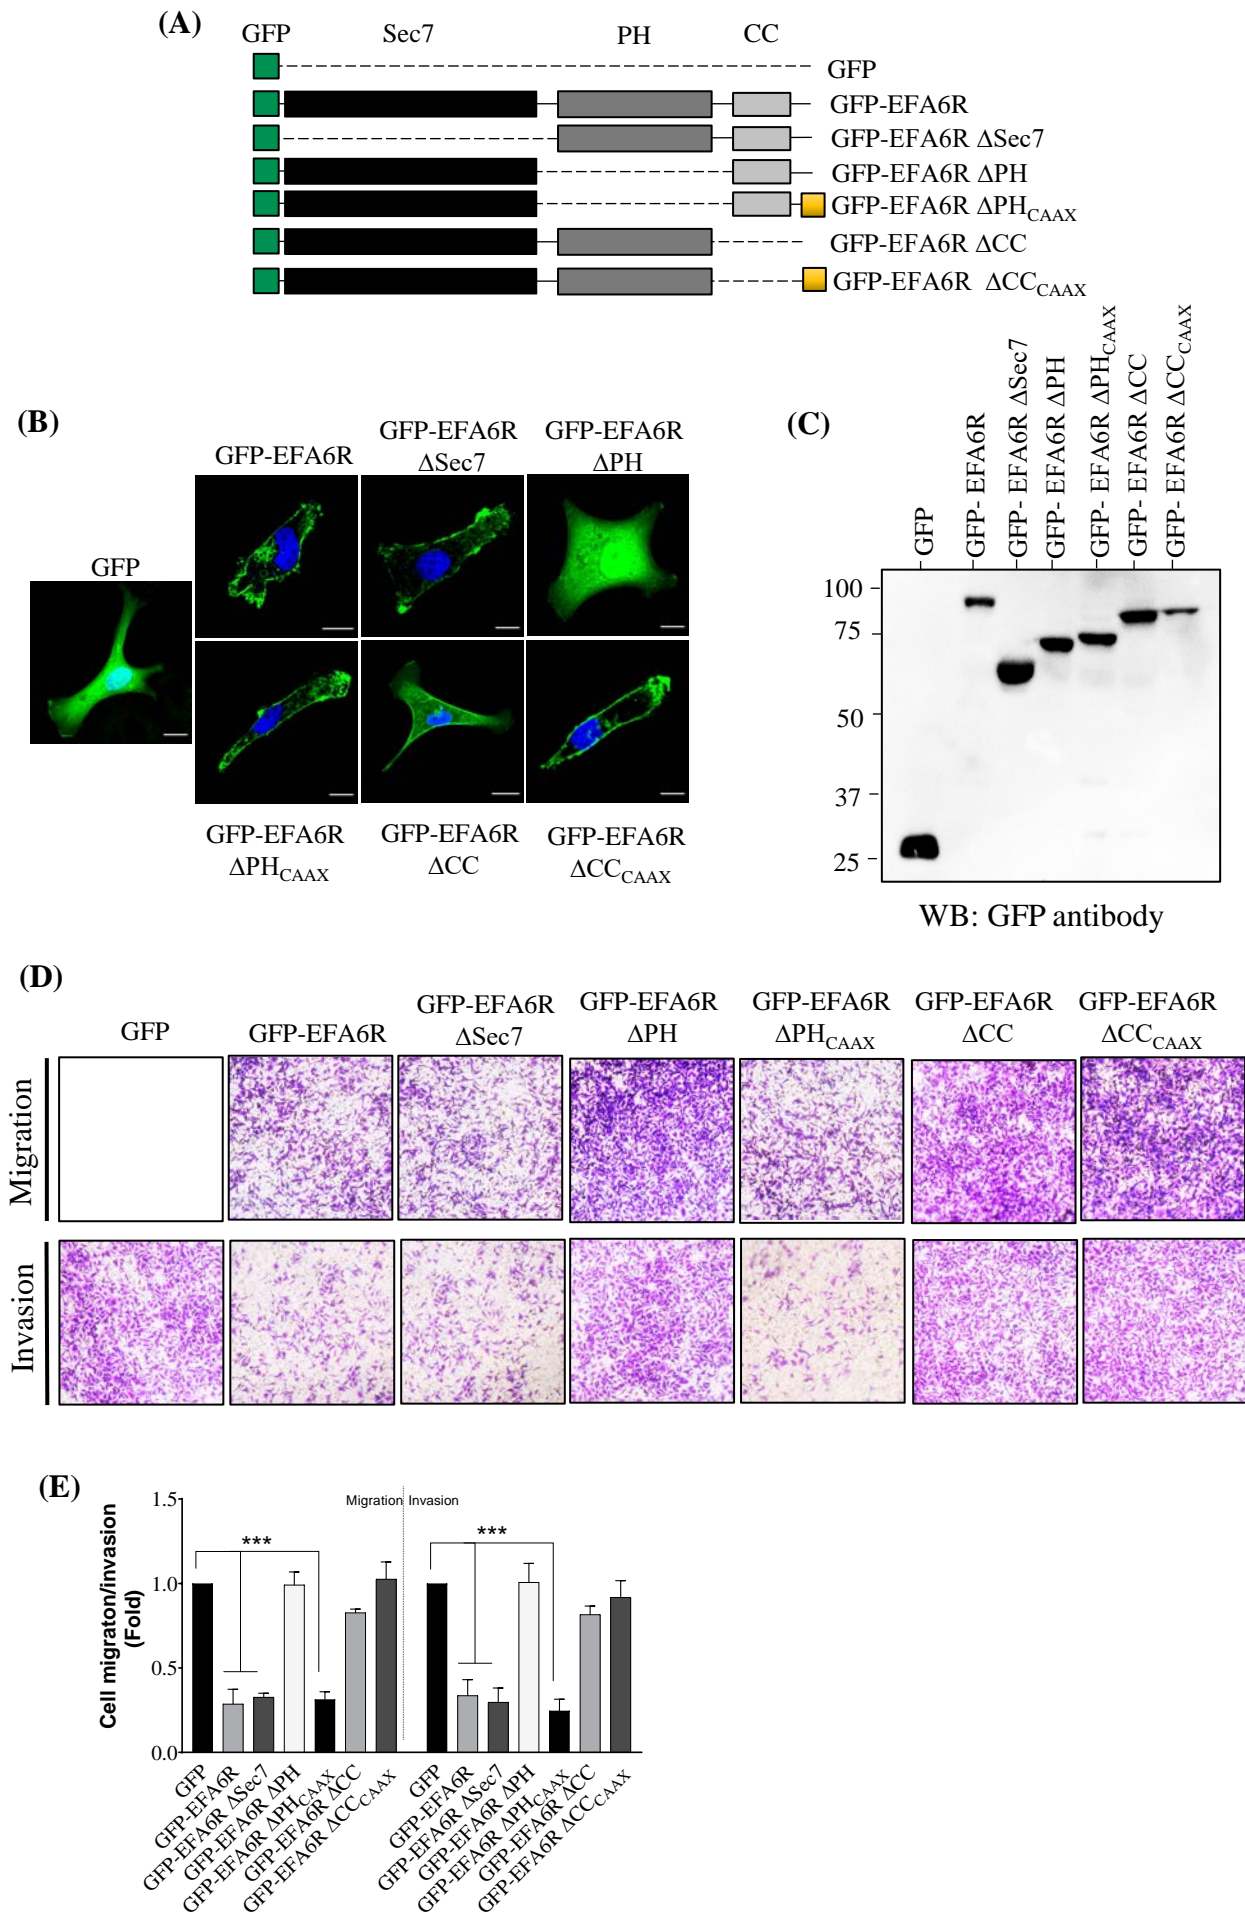

**Fig. 3**

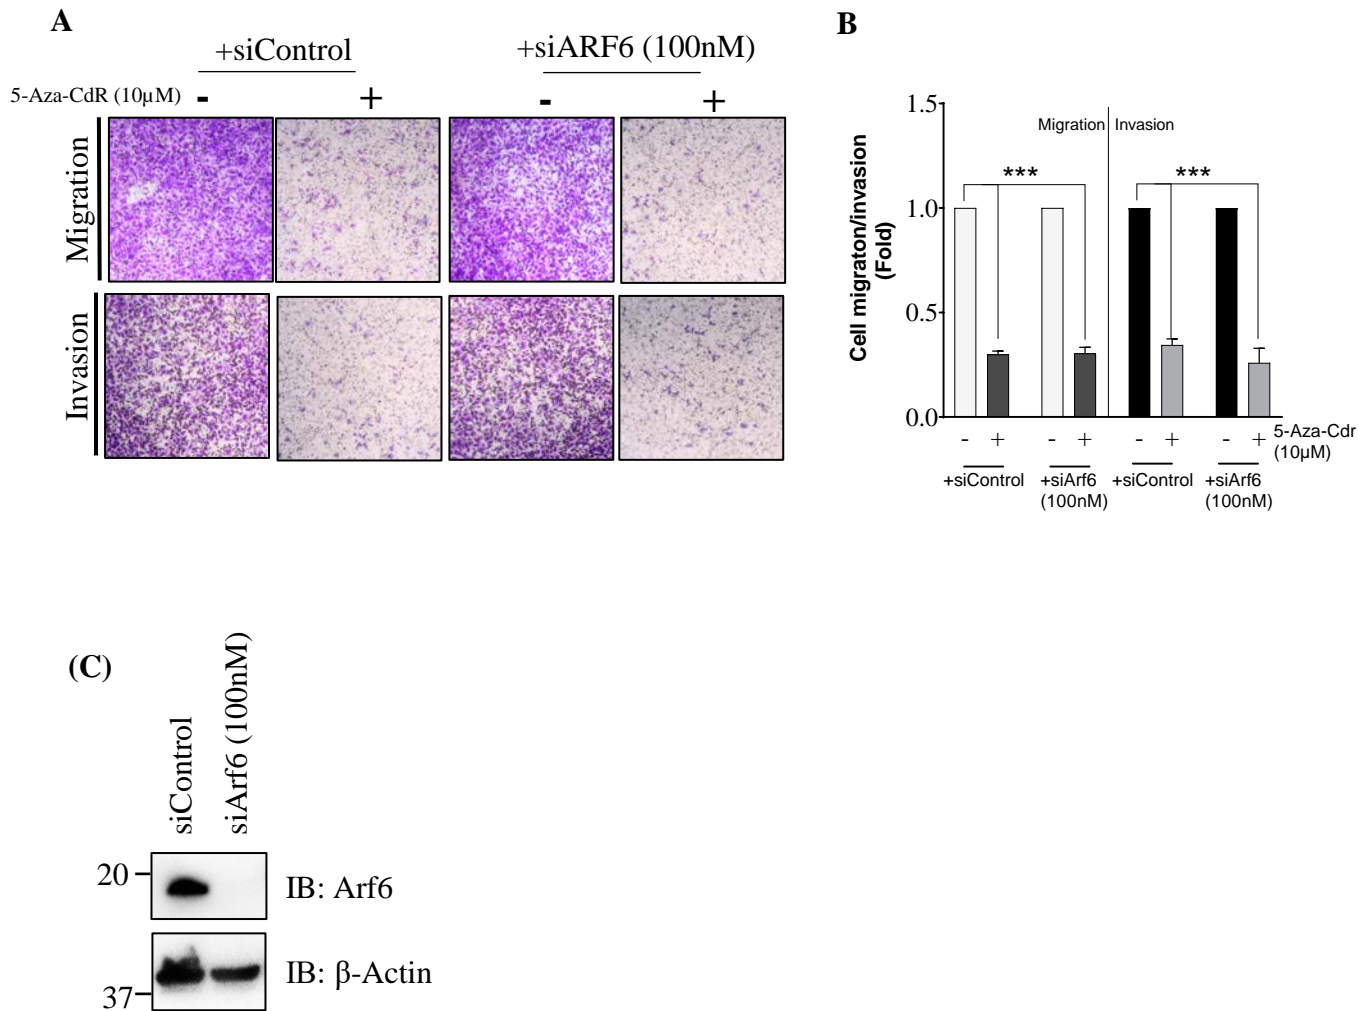

**Fig. 4**
